# Supplementary material for: Association of Adiponectin Polymorphism with Metabolic Syndrome Risk and Adiponectin Level with Stroke Risk: A Meta-Analysis
Source: PubMed Central journal article supplement (PMC5005996; doi:10.1038/srep31945), 2016-08-31
Supplement: srep31945-s1.pdf [file srep31945-s1.pdf]

# **Association of Adiponectin Polymorphism with Metabolic Syndrome**

## **Risk and Adiponectin Level with Stroke Risk:**

### **A Meta-Analysis**

Hui-Ping Yuan<sup>1§</sup>, Liang Sun<sup>1</sup>, Xing-Hui Li<sup>1</sup>, Fu-Gang Che<sup>1</sup>, Xiao-Quan Zhu<sup>1</sup>, Fan Yang<sup>1</sup>, Jing Han<sup>1</sup>,  
Chun-Yuan Jia<sup>1</sup>, Ze Yang<sup>1§</sup>

<sup>1</sup>The Key Laboratory of Geriatrics, Beijing Hospital, National Center of Gerontology & Beijing Institute of Geriatrics, Ministry of Health, Beijing 100730, P.R. China.

### **Supplementary Data**

**Supplementary Table S1. Stratified Meta-analyses of Adiponectin Levels per 5 µg/ml Increment and Risk of Stroke.**

**Supplementary Table S2. Characteristics of the Identified Studies of Meta-Analyses on *ADIPOQ* +45T>G and Risk of Metabolic-related Disease.**

**Supplementary Table S3. Scale for Methodological Quality Assessment for Identified Studies on *ADIPOQ* +45T>G and MS risk.**

**Supplementary Table S4. Quality Assessment of Included Studies on Adiponectin and Risk of Stroke.**

**Supplementary Fig. S1. Flow chart of literature selection for the meta-analysis.**

**Supplementary Fig. S2. Risk of incident stroke for the highest compared with the lowest category of serum adiponectin level.**

**Supplementary Fig. S3. Stratified meta-analysis for *ADIPOQ* +45T>G and the risk of metabolic syndrome.**

**Supplementary Fig. S4. Publication bias and sensitivity analysis for identified studies of two meta-analyses.**

### **Supporting References**

**Supplementary Table S1. Stratified Meta-Analyses of Adiponectin Levels per 5 µg/ml Increment and Risk of Stroke<sup>a</sup>.**

| Characteristic                            | Data Points,<br>No. | Summary RR<br>(95%CI) <sup>b</sup> | P Value for<br>Heterogeneity | I <sup>2</sup> % | P Value for<br>meta-regression <sup>c</sup> |
|-------------------------------------------|---------------------|------------------------------------|------------------------------|------------------|---------------------------------------------|
| All studies                               | 13 <sup>a</sup>     | 1.05 (1.00-1.10)                   | 0.069                        | 54.6             |                                             |
| Study design                              |                     |                                    |                              |                  | 0.952                                       |
| Nested case-control                       | 9                   | 1.05 (0.97-1.13)                   | 0.01                         | 60.0             |                                             |
| Prospective                               | 4                   | 1.06 (0.99-1.14)                   | 0.16                         | 42.1             |                                             |
| Indicators of participant characteristics |                     |                                    |                              |                  |                                             |
| Country                                   |                     |                                    |                              |                  | 0.851                                       |
| Europe                                    | 8                   | 1.04 (0.95-1.15)                   | 0.006                        | 64.7             |                                             |
| US                                        | 4                   | 1.06 (1.01-1.12)                   | 0.11                         | 50.4             |                                             |
| Japan                                     | 1                   | 0.95 (0.69-1.31)                   | NA                           | NA               |                                             |
| Mean age                                  |                     |                                    |                              |                  | 0.264                                       |
| <60                                       | 7                   | 1.09 (1.00-1.18)                   | 0.033                        | 56.2             |                                             |
| ≥60                                       | 6                   | 1.02 (0.95-1.09)                   | 0.048                        | 55.3             |                                             |
| Sex                                       |                     |                                    |                              |                  | 0.699                                       |
| Men                                       | 5                   | 1.08 (0.94-1.22)                   | 0.033                        | 61.9             |                                             |
| Women                                     | 4                   | 1.04 (0.97-1.11)                   | 0.082                        | 55.3             |                                             |
| Whole                                     | 4                   | 1.03 (0.91-1.16)                   | 0.048                        | 62               |                                             |
| Follow-up duration (years)                |                     |                                    |                              |                  | 0.144                                       |
| <10                                       | 7                   | 0.99 (0.90-1.08)                   | 0.173                        | 33.4             |                                             |
| ≥10                                       | 6                   | 1.08 (1.02-1.15)                   | 0.016                        | 64.3             |                                             |
| Measure of association                    |                     |                                    |                              |                  | 0.125                                       |
| Risk ratio                                | 3                   | 1.02 (0.95-1.09)                   | 0.158                        | 45.8             |                                             |
| Odds ratio                                | 3                   | 0.96 (0.89-1.05)                   | 0.318                        | 12.7             |                                             |
| Hazard ratio                              | 7                   | 1.13 (1.04-1.22)                   | 0.094                        | 44.5             |                                             |

<sup>a</sup>Analysis based on 11 studies and 13 data points, because men and women were included separately for the study reported. <sup>b</sup>Pooled RRs of MS for each 5 µg/ml increase in adiponectin within the strata of each study characteristic are indicated. <sup>c</sup>Represents the test for significance of the effect across strata.

**Supplementary Table S2. Characteristics of the Identified Studies of Meta-Analyses on ADIPOQ +45T>G and Risk of Metabolic-related Disease.**

| Author               | Year | Components          | Population            | OR(95%CI)        | <i>p</i> <sup>a</sup> | Model <sup>b</sup> | Effects Model <sup>c</sup> | Cases | Controls | No. of Studies |
|----------------------|------|---------------------|-----------------------|------------------|-----------------------|--------------------|----------------------------|-------|----------|----------------|
| WU JJ <sup>1</sup>   | 2014 | obesity             | Mixed                 | 1.39(1.11-1.73)  | 0.004                 | additive           | Fixed                      | 1888  | 2047     | 18             |
| WU JJ <sup>1</sup>   | 2014 | obesity             | Chinese               | 1.54(1.19-2.00)  | 0.001                 | additive           | Fixed                      | 830   | 1010     | 11             |
| YANG Y <sup>2</sup>  | 2013 | cancer <sup>d</sup> | Mixed                 | 0.768(0.63-0.94) | 0.011                 | recessive          | Fixed                      | 5656  | 6321     | 9              |
| YE CC <sup>3</sup>   | 2013 | CRC                 | Asians,<br>Caucasians | 1.22(1.05-1.43)  | 0.010                 | heterozygote       | Fixed                      | 1250  | 1525     | 5              |
| WANG J <sup>4</sup>  | 2014 | NAFLD               | Asians,<br>Caucasians | 1.48(1.07-2.06)  | 0.020                 | additive           | Fixed                      | 644   | 895      | 7              |
| CHEN J <sup>5</sup>  | 2012 | T2DM                | Chinese               | 1.41(1.20-1.67)  | <0.001                | additive           | Random                     | 3737  | 3247     | 19             |
| LIN Z <sup>6</sup>   | 2014 | DN                  | Caucasians            | 1.12(1.01-1.25)  | 0.038                 | allele<br>contrast | Fixed                      | 2654  | 7710     | 9              |
| XI B <sup>7</sup>    | 2012 | hypertension        | Chinese               | 1.22(1.01-1.48)  | NA                    | recessive          | Fixed                      | 1812  | 2631     | 6              |
| ZHOU DH <sup>8</sup> | 2014 | CVD                 | Caucasians            | 1.22(1.08-1.39)  | 0.002                 | allele<br>contrast | Random                     | 12378 | 19368    | 28             |
| ZHANG                | 2012 | CVD                 | Mixed                 | 1.22(1.07-1.39)  | 0.004                 | additive           | Random                     | 6398  | 10829    | 24             |

|                      |      |      |       |                 |       |                    |        |      |      |    |  |
|----------------------|------|------|-------|-----------------|-------|--------------------|--------|------|------|----|--|
| H[BC, 2012           |      |      |       |                 |       |                    |        |      |      |    |  |
| #369]                |      |      |       |                 |       |                    |        |      |      |    |  |
| ZHANG                |      |      |       |                 |       |                    |        |      |      |    |  |
| H[BC, 2012           | 2012 | CHD  | Mixed | 1.29(1.09-1.52) | 0.004 | additive           | Random | 4685 | 5881 | 17 |  |
| #369]                |      |      |       |                 |       |                    |        |      |      |    |  |
| GAO LL <sup>10</sup> | 2012 | POVS | Mixed | 1.36(1.12-1.65) | 0.002 | allele<br>contrast | Fixed  | 792  | 1322 | 8  |  |
| YUAN HP              | 2014 | MS   | Mixed | 1.30(1.03-1.65) | 0.027 | dominant           | Fixed  | 4113 | 3637 | 16 |  |

Note: MS: Metabolic syndrome; CRC: colorectal cancer; NAFLD: non alcoholic fatty liver disease; T2DM: type 2 diabetes; DN: diabetic nephropathy; CVD: cardiovascular disease; CHD: coronary heart disease; POVS: polycystic ovary syndrome; NA = not available;

<sup>a</sup> *P* value calculated based on the corresponding models; <sup>b</sup> the most significant genetic model; <sup>c</sup> effects model for quantitatively synthesis of individual study; <sup>b</sup> prostate cancer, colorectal cancer, lung cancer, breast cancer and pancreas cancer are included.

**Supplementary Table S3. Scale for Methodological Quality Assessment for Identified Studies on ADIPOQ +45T>G and MS risk.**

| <b>Criteria</b>                                                    | <b>Score</b> |
|--------------------------------------------------------------------|--------------|
| 1.Representativeness of cases                                      |              |
| MS diagnosed criteria to acknowledged criteria                     | 2            |
| Mentioned the diagnosed criteria but not specifically described    | 1            |
| Not described                                                      | 0            |
| 2.Source of controls                                               |              |
| Population or community based                                      | 3            |
| Hospital-based MS-free controls                                    | 2            |
| Healthy volunteers without total description                       | 1            |
| MS-free controls with related diseases                             | 0.5          |
| Not described                                                      | 0            |
| 3.Sample size                                                      |              |
| >400                                                               | 2            |
| 200-400                                                            | 1            |
| <200                                                               | 0            |
| 4.Quality control of genotyping methods                            |              |
| Repetition of partial/total tested samples with a different method | 2            |
| Repetition of partial/total tested samples with the same method    | 1            |
| Not described                                                      | 0            |
| 5.Hardy-Weinberg equilibrium (HWE)                                 |              |
| Hardy-Weinberg equilibrium in control subjects                     | 1            |
| Hardy-Weinberg disequilibrium in control subjects                  | 0            |

**Supplementary Table S4. Quality Assessment of Included Studies on Adiponectin and Risk of Stroke.**

| <b>Study</b>                  | <b>Selection</b> | <b>Comparability</b> | <b>Outcome/Exposure</b> | <b>Overall quality</b> |
|-------------------------------|------------------|----------------------|-------------------------|------------------------|
| Söderberg S <sup>11</sup>     | 4                | 2                    | 3                       | 9                      |
| Matsumoto M <sup>12</sup>     | 4                | 2                    | 2                       | 8                      |
| David J Stott <sup>13</sup>   | 3                | 2                    | 2                       | 7                      |
| Ogorodnikova AD <sup>14</sup> | 3                | 2                    | 3                       | 8                      |
| P. Khalili <sup>15</sup>      | 3                | 1                    | 2                       | 6                      |
| Rajpathak SN <sup>16</sup>    | 3                | 2                    | 3                       | 8                      |
| Prugger C <sup>17</sup>       | 3                | 1                    | 3                       | 7                      |
| Wannamethee SG <sup>18</sup>  | 4                | 1                    | 3                       | 8                      |
| Gardener H <sup>19</sup>      | 4                | 1                    | 3                       | 8                      |
| Bidulescu A <sup>20</sup>     | 3                | 1                    | 2                       | 6                      |
| Kizer JR <sup>21</sup>        | 3                | 2                    | 2                       | 7                      |
| Arregui M <sup>22</sup>       | 3                | 1                    | 2                       | 6                      |

**Supplementary Fig. S1. Flow chart of literature selection for the meta-analysis.**

A.

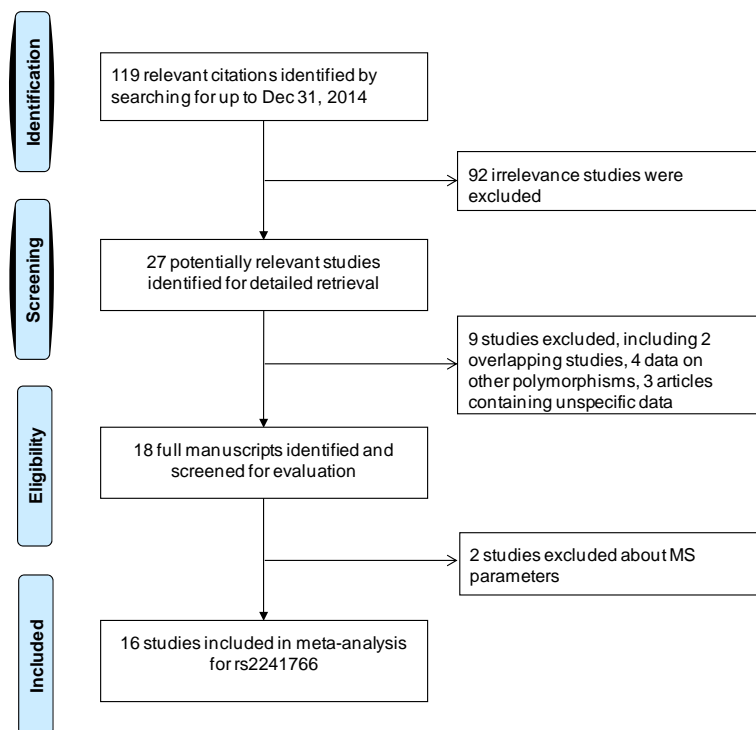

B.

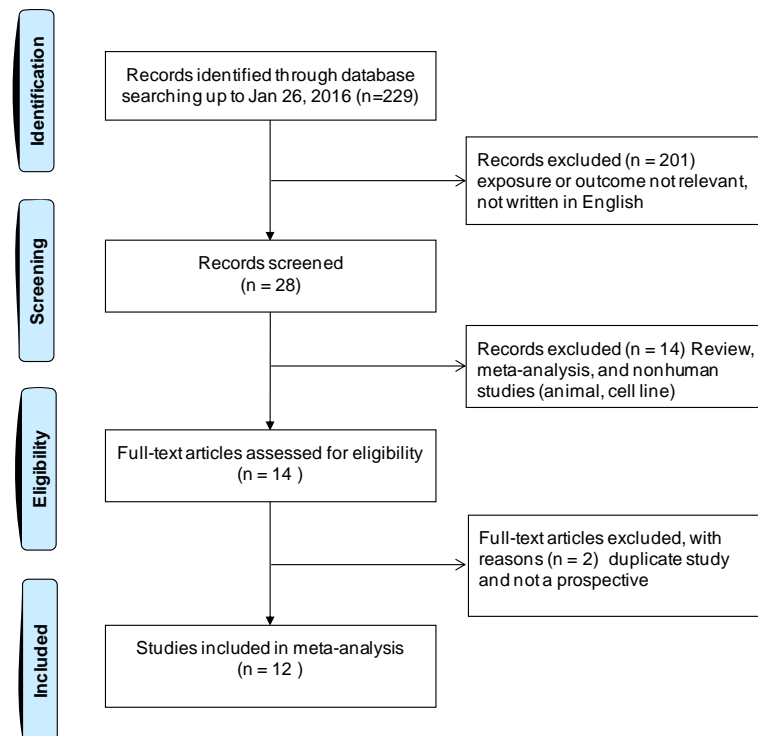

Flow diagram of eligible studies selection: articles were identified up to Dec 31, 2014 and Jan 26, 2016 for *ADIPOQ* +45T>G & MS (A) and adiponectin & stroke (B), respectively.

**Supplementary Fig. S2. Risk of incident stroke for the highest compared with the lowest category of serum adiponectin level.**

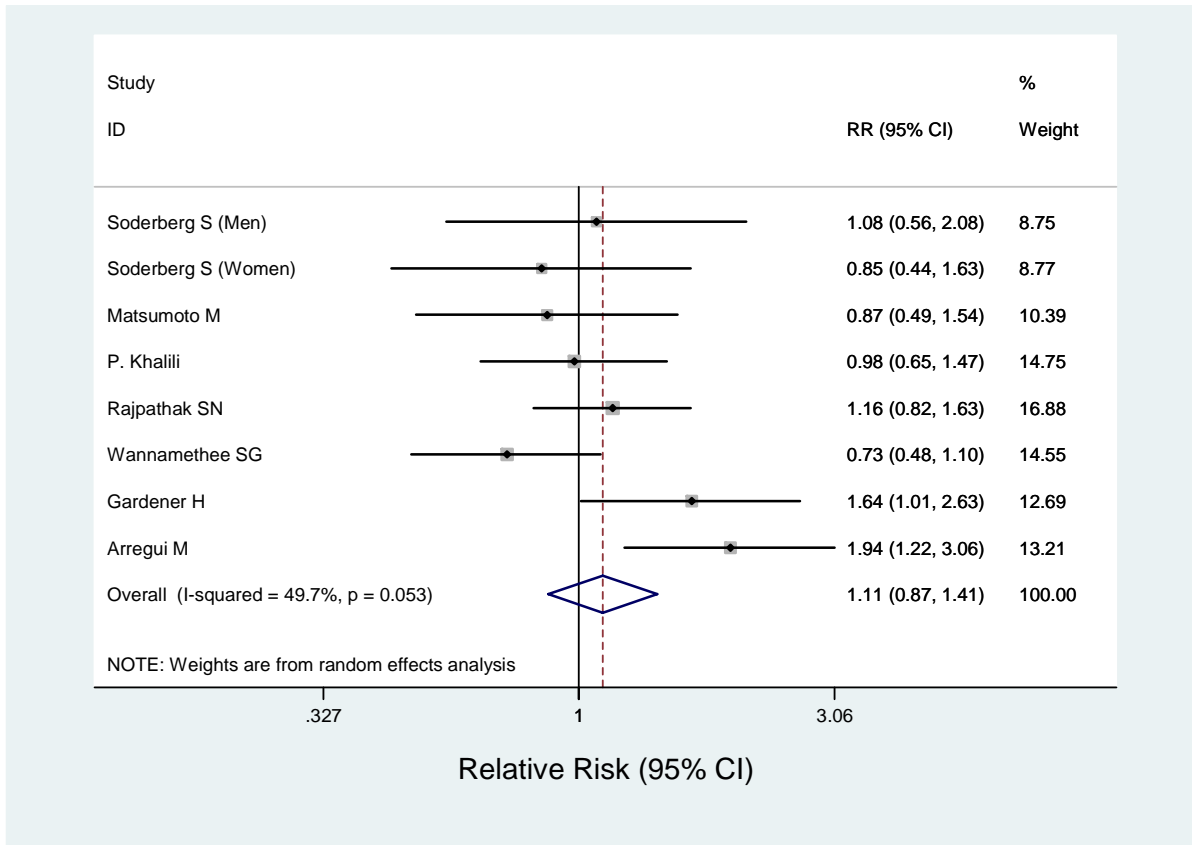

Random-effects model analysis for overall RR (1.11, 95% CI=0.87-1.41) of incident stroke for the highest compared with the lowest category of adiponectin level. The square sizes are proportional to the weight of each study in the meta-analysis; the horizontal lines represent 95% CIs; the diamond represents the overall RR with its 95% CI.



**Supplementary Fig. S3. Stratified meta-analysis for *ADIPOQ* +45T>G and the risk of metabolic syndrome.**

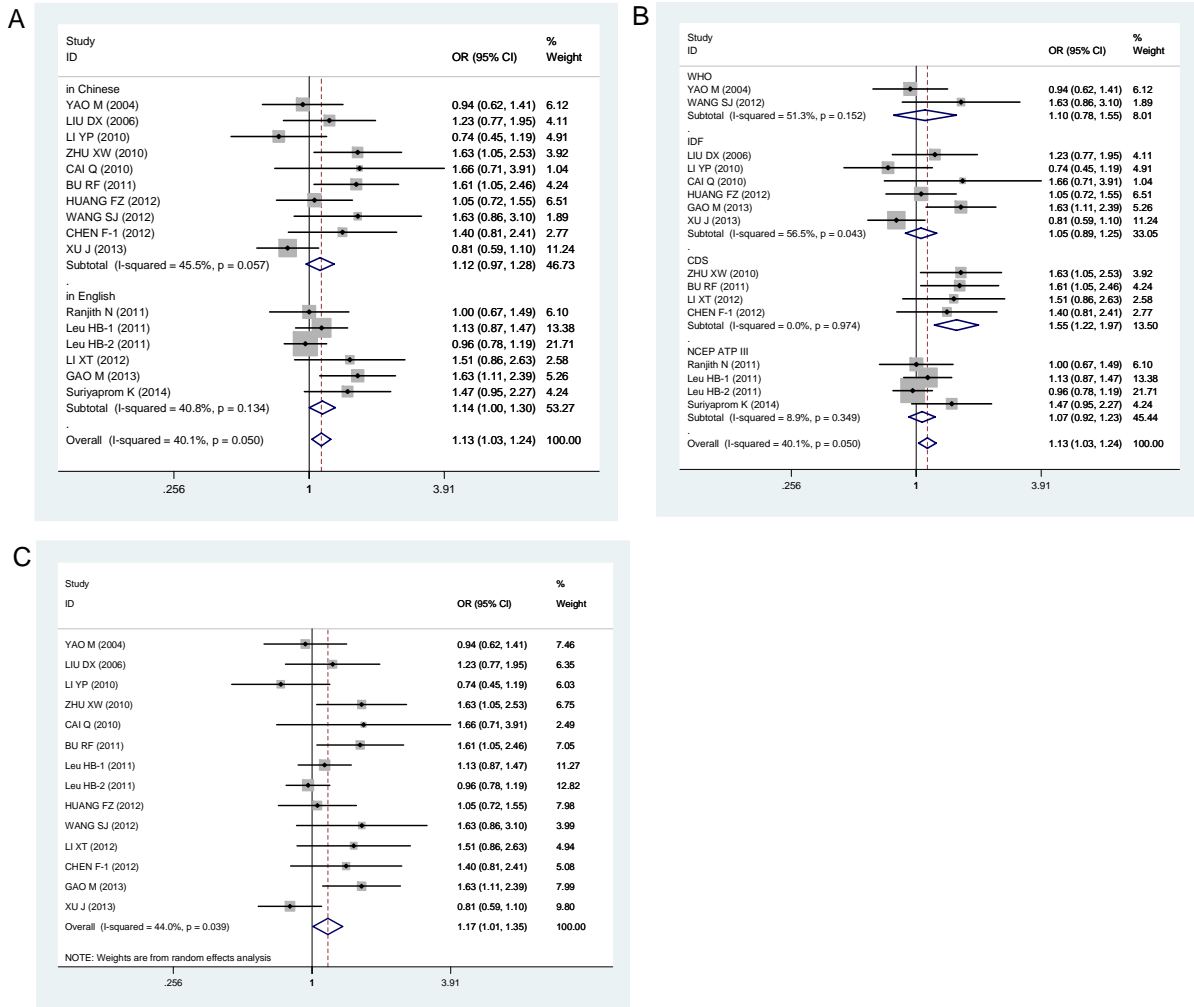

Stratified analyses for *ADIPOQ* +45T>G and the risk of MS. The square sizes are proportional to the weight of each study in the meta-analysis; the horizontal lines represent 95% CIs; the diamond represents the overall RR with its 95% CI.

**Supplementary Fig. S4. Publication bias and sensitivity analysis for identified studies of two meta-analyses.**

A.

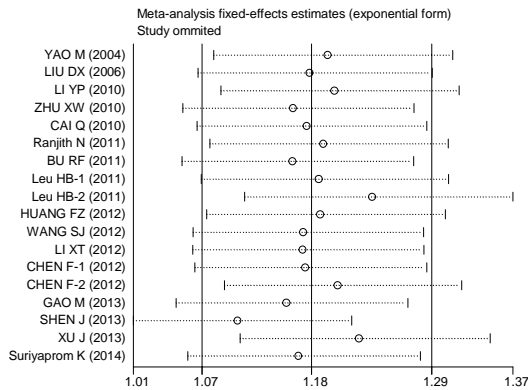

B.

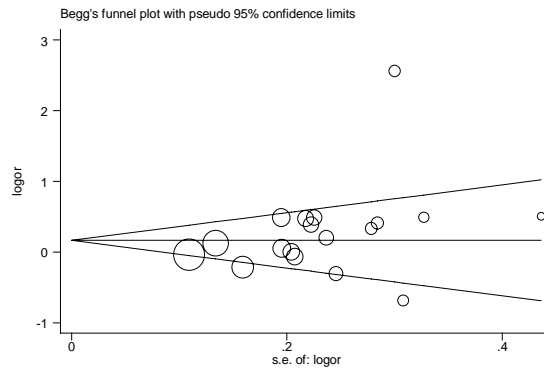

C.

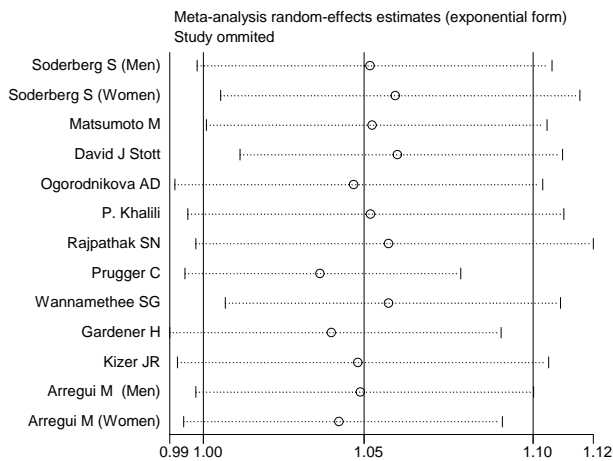

D.

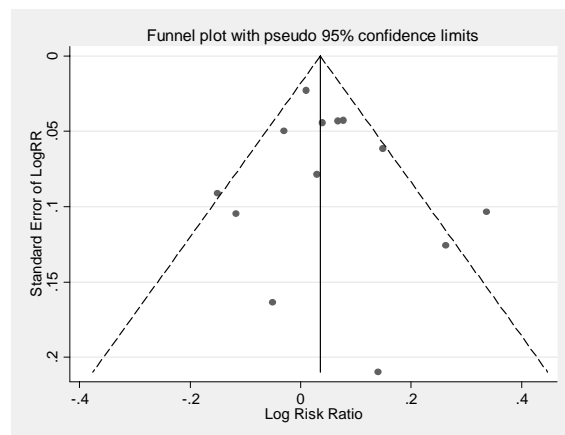

(A) Sensitivity analysis of the primary analysis (*ADIPOQ* +45T>G & MS): Horizontal line means effect size. Abbreviations: s.e: standardized effect; (B) Bgger's Funnel plot of the primary analysis to assess publication bias (*ADIPOQ* +45T>G & MS): Each point represents a separate study included in this meta-analysis. s.e: standardized effect. Leu HB-1 and Leu HB-2 represents two separate populations. CHEN F-1: MS; CHEN F-2: MS with CHD; (C) Sensitivity analysis of the secondary analysis (adiponectin & stroke): Horizontal line means effect size. Abbreviations: s.e: standardized effect; (D) Funnel plot of the secondary analysis (adiponectin & stroke) to assess publication bias: Each point represents a separate study included in this meta-analysis. s.e: standardized effect.

## Supporting References

1. Wu, J., Liu, Z., Meng, K., & Zhang, L., Association of adiponectin gene (ADIPOQ) rs2241766 polymorphism with obesity in adults: a meta-analysis. *PLoS One* **9** (4), e95270 (2014).
2. Yang, Y. *et al.*, ADIPOQ gene polymorphisms and cancer risk: a meta-analysis. *Cytokine* **61** (2), 565-571 (2013).
3. Ye, C. *et al.*, Meta-analysis of adiponectin polymorphisms and colorectal cancer risk. *Int J Med Sci* **10** (9), 1113-1120 (2013).
4. Wang, J. *et al.*, Adiponectin polymorphisms and non-alcoholic fatty liver disease risk: A meta-analysis. *J Gastroenterol Hepatol* **29** (7), 1396-1405 (2014).
5. Jing, C., Xueyao, H., & Linong, J., Meta-analysis of association studies between five candidate genes and type 2 diabetes in Chinese Han population. *Endocrine* **42** (2), 307-320 (2012).
6. Lin, Z., Huang, G., Zhang, J., & Lin, X., Adiponectin gene polymorphisms and susceptibility to diabetic nephropathy: a meta-analysis. *Ren Fail* **36** (3), 478-487 (2014).
7. Xi, B. *et al.*, Common polymorphisms (rs2241766 and rs1501299) in the ADIPOQ gene are not associated with hypertension susceptibility among the Chinese. *Mol Biol Rep* **39** (9), 8771-8775 (2012).
8. Zhou, D. *et al.*, Association between the adiponectin +45T>G genotype and risk of cardiovascular disease: a meta-analysis. *Heart Lung Circ* **23** (2), 159-165 (2014).
9. Zhang, H., Mo, X., Hao, Y., & Gu, D., Association between polymorphisms in the adiponectin gene and cardiovascular disease: a meta-analysis. *BMC Med Genet* **13**, 40 (2012).
10. Gao, L. *et al.*, Association of the T45G and G276T polymorphisms in the adiponectin gene with PCOS: A meta-analysis. *Gynecol Endocrinol* **28** (2), 106-110 (2012).
11. Soderberg, S. *et al.*, Leptin, but not adiponectin, predicts stroke in males. *J Intern Med* **256** (2), 128-136 (2004).
12. Matsumoto, M., Ishikawa, S., & Kajii, E., Association of adiponectin with cerebrovascular disease: a nested case-control study. *Stroke* **39** (2), 323-328 (2008).
13. Stott, D.J. *et al.*, Adipocytokines and risk of stroke in older people: a nested case-control study. *Int J Epidemiol* **38** (1), 253-261 (2009).
14. Ogorodnikova, A.D. *et al.*, High-molecular-weight adiponectin and incident ischemic stroke in postmenopausal women: a Women's Health Initiative Study. *Stroke* **41** (7), 1376-1381 (2010).
15. Khalili, P. *et al.*, Total adiponectin does not predict cardiovascular events in middle-aged men in a prospective, long-term follow-up study. *Diabetes Metab* **36** (2), 137-143 (2010).
16. Rajpathak, S.N. *et al.*, Resistin, but not adiponectin and leptin, is associated with the risk of ischemic stroke among postmenopausal women: results from the Women's Health Initiative. *Stroke* **42** (7), 1813-1820 (2011).
17. Prugger, C. *et al.*, Adipocytokines and the risk of ischemic stroke: the PRIME Study. *Ann Neurol* **71** (4), 478-486 (2012).
18. Wannamethee, S.G. *et al.*, Adiposity, adipokines, and risk of incident stroke in older men. *Stroke* **44** (1), 3-8 (2013).
19. Gardener, H. *et al.*, Adiponectin and risk of vascular events in the Northern Manhattan study. *Atherosclerosis* **226** (2), 483-489 (2013).
20. Bidulescu, A. *et al.*, Associations of adiponectin and leptin with incident coronary heart disease and ischemic stroke in african americans: the jackson heart study. *Front Public Health* **1**, 16 (2013).
21. Kizer, J.R. *et al.*, Total and high-molecular-weight adiponectin and risk of coronary heart disease and ischemic stroke in older adults. *J Clin Endocrinol Metab* **98** (1), 255-263 (2013).
22. Arregui, M. *et al.*, Adiponectin and risk of stroke: prospective study and meta-analysis. *Stroke* **45** (1), 10-17 (2014).
